# **Teratogenic Drug Topiramate Upregulates TGFβ1 and SOX9 Expression in Primary Palatal Mesenchyme Cells**

Syed K. Rafi<sup>1§\*</sup>, Jeremy P. Goering<sup>1§</sup>, Adam J. Olm-Shipman<sup>1</sup>, Lauren A. Hipp<sup>1</sup>, Nicholas J. Ernst<sup>1</sup>, Nathan R. Wilson<sup>1‡</sup>, Everett G. Hall<sup>1¶</sup>, Sumedha Gunewardena<sup>2</sup>, Irfan Saadi<sup>1\*</sup>.

<sup>1</sup>Department of Anatomy and Cell Biology, University of Kansas Medical Center, Kansas City, KS.

<sup>2</sup>Department of Molecular and Integrative Physiology, University of Kansas Medical Center, Kansas City, KS.

§These authors contributed equally.

‡Current address: Center for Regenerative Medicine, Massachusetts General Hospital, Harvard Medical School, Boston, MA.

¶Current address: Clinical Research Training Center, Institute of Clinical and Translational Sciences, Washington University, St. Louis, MO.

\*To whom correspondence should be addressed:

## **Irfan Saadi, PhD**

Associate Professor, Department of Anatomy and Cell Biology,

University of Kansas Medical Center, 3901 Rainbow Blvd., Kansas City, KS 66160

Tel: 913-588-7667, Email: [isaadi@kumc.edu](mailto:isaadi@kumc.edu)

## **Syed K. Rafi, PhD**

Senior Scientist, Department of Anatomy and Cell Biology,

University of Kansas Medical Center, 3901 Rainbow Blvd., Kansas City, KS 66160

Current address: Genetic Services, 3237 Apex Cir, Falls Church, VA. 22044

Email: [rafigene@yahoo.com](mailto:rafigene@yahoo.com) / [srafi2@kumc.edu](mailto:srafi2@kumc.edu)

# **Abstract**

Topiramate is a commonly prescribed anti-epileptic drug with over 8 million prescriptions dispensed annually. Topiramate use during pregnancy has been linked to significantly increased risk of babies born with orofacial clefts (OFCs). However, the exact molecular mechanism of topiramate teratogenicity is unknown. We used an unbiased antibody array analysis to test the effect of topiramate on human embryonic palatal mesenchyme (HEPM) cells. This analysis identified 40 differentially expressed proteins, showing strong connectivity to known OFC genes. However, among known OFC genes, only TGF $\beta$ 1 was significantly upregulated in the antibody array analysis. Next, we validated that topiramate could increase expression of TGF $\beta$ 1 and of downstream target phospho-SMAD2 in primary mouse embryonic palatal mesenchyme (MEPM) cells. Furthermore, we showed that topiramate treatment of primary MEPM cells increased expression of SOX9. SOX9 overexpression in chondrocytes is known to cause cleft palate in mouse. We propose that topiramate mediates upregulation of TGF $\beta$ 1 signaling through activation of  $\gamma$ -aminobutyric acid (GABA) receptors in the palate. TGF $\beta$ 1 and SOX9 play critical roles in orofacial morphogenesis, and their abnormal overexpression may underlie the teratogenic effects of topiramate.

# **Keywords**

Topiramate, birth defects, teratogenicity, TGF $\beta$  signaling, orofacial clefts, cleft lip and palate

# Introduction

Topiramate is an anti-epileptic drug that was approved by the U.S. Food and Drug Administration (FDA) for the treatment of partial onset or primary generalized tonic-clonic seizures in 1996 and for migraine prophylaxis in 2004. Topiramate is currently used either as a monotherapy or an adjunctive therapy to treat partial-onset seizures, primary generalized tonic-clonic seizures, and other seizure disorders. In addition, topiramate has been used off-label for binge-eating disorder [1], bulimia nervosa [2], alcohol use disorder [3], anti-psychotic induced weight gain [4], and essential tremor [5]. Verispan's Vector One®: National (VONA) and IQVIA's Total Patient Tracker® (TPT) reported that, between January 2007 and December 2010, approximately 4.3 million patients filled 32.3 million topiramate prescriptions ([FDA Drug Safety Communication, 03-04-2011](#)). This number has risen to approximately 4.1 million patients receiving a prescription for topiramate between March 2014 and February 2016 (FDA Pediatric Postmarketing Pharmacovigilance and Drug Utilization Review for topiramate; June 20, 2016). According to estimates in the United States alone, approximately 1.3 million epileptic women are of childbearing age [6], and approximately 24,000 children are born annually to epileptic mothers (North American Antiepileptic Drug Pregnancy Registry) [7]. Thus, control of seizures during pregnancy is an important public health challenge, as women with epilepsy have a higher risk of peripartum complications including stillbirth, preeclampsia, preterm labor, and a 10-fold increase in mortality compared to women without epilepsy [8].

Topiramate use during pregnancy has been linked to a significantly increased risk of birth defects affecting orofacial, cardiac and urogenital development [9-11]. Multiple studies have reported that the incidence of oral clefts in particular is increased in topiramate-exposed pregnancies [9, 10, 12,

13]. In the North American Antiepileptic Drug Pregnancy Registry [14], the relative risk of oral clefts in topiramate-exposed pregnancies was ~13-fold higher than the general risk in births [15]. The FDA has now changed the classification of topiramate from a pregnancy-C category to a pregnancy-D category drug, warning that topiramate can cause fetal harm when administered to a pregnant woman ([FDA Drug Safety Communication, 03-04-2011](#)). Despite broad use and teratogenic potential of topiramate, the molecular mechanism(s) underlying the increased occurrence of major congenital malformations is not understood [6, 7, 10, 12, 16].

Normal palate development during embryogenesis is a multistep process that begins with bilateral vertical growth of the palatal shelves adjacent to the tongue till embryonic day 13.5 (E13.5). These shelves then elevate above the tongue, move horizontally and fuse in the midline to form the palate by E15.5. The palatal shelf is mainly composed of the oral ectoderm derived epithelial cells and the neural crest derived mesenchymal cells. Defects in neural crest function are sufficient to cause cleft palate [17, 18]. To investigate the potential effect of topiramate exposure on palate development, we first treated human embryonic palate mesenchyme (HEPM) cells with a high dose of topiramate, then performed an unbiased exploratory antibody-array approach to identify misregulated proteins. Our analysis showed upregulation of transforming growth factor beta one (TGFβ1) expression and altered activation of cell survival networks. We then validated our findings in primary mouse embryonic palate mesenchyme (MEPM) cells following exposure to a range of topiramate concentrations. We showed that TGFB1 levels are indeed upregulated even at physiological 50μM topiramate treatment for six hours. Topiramate treatment of primary MEPM cells also increased expression of SOX9, a known clefting gene and TGFB1 target. We propose that perturbation of TGFβ pathway and SOX9 expression through γ-aminobutyric acid

(GABA) receptors in the palate represents a plausible etiologic mechanism underlying topiramate-induced oral clefts.

## **Materials and Methods**

### *Culture of HEPM cell line*

Human embryonic palatal mesenchyme (HEPM) cells (ATCC, CRL-1486) were cultured in DMEM media, with high concentration of glucose and pyruvate, supplemented with 10% fetal bovine serum and penicillin/streptomycin. Topiramate (Sigma-Aldrich, St. Louis, MO) was resuspended in ethanol. HEPM cells were treated with 1000 $\mu$ M topiramate and cultured at 37°C for 6 hours. Cells were briefly washed with PBS, scraped and flash-frozen for subsequent RNA and protein extraction.

### *Isolation and culture of Primary MEPM Cells*

Palatal shelves were excised from wildtype E13.5 mouse embryos. The mesenchyme was dissociated into a single-cell suspension by incubating the palatal shelves in 0.25% Trypsin for 10 minutes and then vigorously pipetting up and down to mechanically separate the cells. The resulting Mouse Embryonic Palatal Mesenchyme (MEPM) cells were then cultured in DMEM media with high glucose and supplemented with 10% Fetal Bovine Serum and Penicillin/Streptomycin. MEPMs were used fresh, never-passaged, before drug treatment. MEPM cells were treated with 25, 50 or 100  $\mu$ M topiramate (ApexBio, Houston, TX) and incubated for 6 hours at 37°C. Ethanol was used for vehicle treatment.

### *Antibody array analysis*

Protein extracts from HEPM cells with vehicle (Control) or with topiramate treatment (1000  $\mu$ M for 6 hours) were analyzed by Full Moon BioSystems (Sunnyvale, CA) Cell Signaling Explorer antibody arrays (SET100), according to manufacturer's protocol. Briefly, control and topiramate-treated HEPM cell lysates were labeled with Cy3 fluorophore using the antibody array assay kit from Full Moon BioSystems (KAS02). Antibody array slides were independently incubated with labeled lysates, washed, and scanned using microarray scanner from Agilent (Santa Clara, CA).

### *Statistical analysis of antibody array data*

Each antibody array comprised of two technical replicates. The experiment was performed in biological duplicates for downstream statistical analysis. Each probe from each of the biological and technical replicates was first determined to be significantly expressed relative to its background intensity. This significance calculation was based on a  $\leq 0.05$  cutoff of the Benjamini and Hochberg [19] adjusted p-value of the t-statistic of the difference between the mean expression (F532 mean) and mean background (B532 mean) intensities. A gene was regarded as not significantly expressed under a particular treatment if any one of its biological replicates was not significantly expressed. The first filtering step removed all genes that were not significantly expressed in either one of the treatment groups. The remaining probes were background corrected using a modified Robust Multi-array Average (RMA) [20] algorithm for protein arrays. The background adjusted probes were log transformed (base 2) and quantile normalized. Technical replicates were then averaged (geometric average) to give the background adjusted normalized expression for each biological replicate. A two-way ANOVA model (factor 1: treatment with levels Control and topiramate treated; factor 2: antibody array with levels array 1 and array 2) was fitted to the data to determine the gene level significance of the difference in expression between

Control and topiramate treated samples. Protein expression with a p-value  $\leq 0.05$  and absolute fold change  $\geq 1.15$  were deemed sufficiently differentially expressed for protein arrays, yielding 40 proteins for further analysis.

### *Gene interaction analysis*

The Ingenuity Pathway Analysis software (IPA, Qiagen, [www.qiagenbioinformatics.com](http://www.qiagenbioinformatics.com)) was used to build a gene interaction network of the 40 differentially expressed proteins and 107 known OFC genes identified by IPA. The aim was to establish a single network of interactions between as many of the 40 differentially expressed proteins from the antibody array and the 107 OFC genes. IPA performs this task with the aid of its knowledge database consisting of literature-based curated information on genes and gene product interactions.

### *Western Blotting*

For protein extraction, MEPM cells were briefly washed with PBS, scraped and either flash-frozen or lysed immediately. Cells were lysed by suspension in radioimmunoprecipitation assay (RIPA) buffer with HALT protease inhibitor Cocktail (Thermo Scientific, Waltham, MA) and by agitation for 30 minutes at 4°C. Cell lysates were centrifuged for 10 minutes at 13,000 rcf and the protein extracts (supernatant) collected. Lysates were then electrophoresed in 4-15% gradient Mini-Protean TGX Stain-Free precast gels (Bio-RAD, Hercules, CA). After electrophoresis, the gels were exposed to UV light for 45 seconds to develop the total protein signal and imaged on a ChemiDoc System (Bio-RAD, Hercules, CA) before being transferred onto Immobilon PVDF membranes (EMD Millipore, Billerica, MA). PVDF membranes were then blocked in Odyssey Blocking Buffer (Li-Cor, Lincoln, NE) either overnight at 4°C or at room

temperature for 1 hour. Primary antibodies used were anti-TGF $\beta$ 1 (1:1000; Abcam, Cambridge, MA), anti-phospho-SMAD2 (1:5000; Cell Signaling Technologies, Danvers, MA), and anti-SOX9 (1:5000; Abgent, San Diego, CA), and anti-SOX10 (1:5000; Aviva Systems, San Diego, CA). Secondary antibodies used were HRP-linked goat anti-rabbit IgG (1:10,000; Cell Signalling Technologies, Danvers, MA) and HRP-linked goat anti-mouse IgG (1:10,000; Santa Cruz Biotechnologies, Dallas, TX). Femto SuperSignal West ECL reagent (Thermo Scientific, Waltham, MA) was used to develop the signal. Image Lab software (Bio Rad, Hercules, CA) was used to quantitate total protein and western blot intensity. Each blot was normalized to the total protein loaded, and then fold change calculated by dividing total drug-treated samples by vehicle-treated sample.

### *Immunofluorescence and Imaging Analysis*

MEPM cells cultured as described above, and were fixed in 4% paraformaldehyde (PFA) for 10 min, blocked in phosphate buffered saline (PBS) with 1% goat serum and 0.1% Tween, and stained using Anti-TGF $\beta$ 1 (1:1000; Abcam, Cambridge, MA). After staining, coverslips were mounted in containing DAPI (Vector Labs, Burlingame, CA). Individual cells were imaged, and the levels of TGF $\beta$ 1 fluorescence were quantitated using NIH ImageJ software.

## **Results**

### **Antibody-array-based analysis of HEPM cells following topiramate treatment**

Protein extracts from HEPM cells with supraphysiological topiramate treatment (1000  $\mu$ M for 6 hours) or without the treatment (Control) were assayed by Full Moon BioSystems (Sunnyvale, CA) Cell Signaling Explorer antibody-array. The Cell Signaling Explorer array includes



antibodies for 1358 individual proteins, in two technical replicates, encompassing 20 cellular pathways. The antibody array experiment was performed with two biological replicates. The results were analyzed for statistical significance as described in the Materials and Methods section. Protein levels of 57 gene products were significantly altered ( $p < 0.05$ , Supplementary Table S1). We used a 1.15-fold cutoff ( $|FC| \geq 1.15$ ) [21, 22], resulting in 40 differentially expressed proteins with 19 proteins downregulated and 21 upregulated (Table 1). To determine the importance of these 40 altered gene products to orofacial morphogenesis and OFCs, we used Ingenuity Systems pathway analysis (IPA) as well as manual literature curation.

### **IPA analysis of proteins with altered expression following topiramate treatment shows connectivity with OFC genes**

The antibody array analysis identified statistically significant changes in expression of 40 proteins following topiramate treatment (Table 1;  $p < 0.05$ ,  $|FC| \geq 1.15$ ). Separately, IPA software reported 107 known OFC genes (Supplementary Table S2). Only 18 of the 107 OFC genes were represented on the Full Moon BioSystems Cell Signaling Explorer antibody array. Among these 18 proteins encoded by OFC genes, only TGF $\beta$ 1 was significantly altered (increased) upon topiramate treatment of HEPM cells.

We also analyzed the 40 gene products with IPA for changes in diseases and bio-functions (Supplementary Table S3). The top predicted categories were related to “cell death and survival”, and “organismal growth and development”. Overall, IPA predicted that topiramate treatment decreased cell viability (Supplementary Table S3; IPA Ranks 13, 29) and increased apoptosis (Supplementary Table S3; IPA Rank 37). However, IPA also correctly predicted increased cell viability of neurons (Supplementary Table S3; IPA Rank 7) [23], consistent with a cell-type

specific effect of topiramate. The top IPA predicted networks also indicated an effect on cell growth and survival pathways (Supplementary Table S4). Next, we looked at connectivity of the genes encoding the 40 altered proteins to the IPA-reported 107 OFC genes (Figure 1). TGFβ1 was the only OFC gene among the 40 topiramate-altered proteins in our analysis. A single network was able to connect 22 (9 downregulated, 13 upregulated) of these 40 (55%) genes encoding differentially expressed proteins to 87 OFC genes (81%), either directly or indirectly. TGFβ1 showed the highest number of connections to known OFC genes (Figure 1). Therefore, we focused our validation studies on TGFβ1.

### **Validation of TGFβ1 upregulation in primary mouse embryonic palate mesenchyme (MEPM) cells following treatment with physiological levels of topiramate**

Our analysis indicated TGFβ1 as the central molecule affected by topiramate treatment of HEPM cells. To confirm that our finding was not an artifact of using an immortalized cell line and supraphysiological levels of topiramate, we used primary MEPM cells and physiological topiramate doses. The peak serum level for even topiramate monotherapy is approximately 25-50 μM [24-26]. Therefore, we initially included both the physiological 50 μM concentration and two supraphysiological concentrations to treat fresh primary MEPM cells from E13.5 embryonic palates for 6 hours (Figure 2A-E). Following treatment, cells were fixed and immunostained using an anti-TGFB1 antibody (Figure 2A-D). Individual cells were imaged, and the levels of TGFB1 were quantitated using NIH ImageJ software. The experiment was repeated three times with different primary MEPM isolations. We saw a significant increase in intracellular TGFβ1 level at the physiological 50μM topiramate treatment (Figure 2E).

We also performed Western blot analysis following 25 $\mu$ M and 50 $\mu$ M topiramate treatments (Figure 2F) and showed a significant increase with 50 $\mu$ M topiramate (Figure 2G). To test for an upregulation of the TGF $\beta$ 1 signaling pathway, we also assessed levels of phospho-SMAD2 (P-SMAD2), a downstream effector molecule (transcription factor) of the ligand-bound TGF $\beta$  receptor that requires phosphorylation to translocate to the nucleus. Indeed, P-SMAD2 levels were increased following both 25 $\mu$ M and 50 $\mu$ M topiramate treatment (Figure 2F,G), indicating a strong upregulation of TGF $\beta$  signaling via SMAD-dependent pathway.

### **Topiramate treatment of primary MEPM cells results in increased SOX9 expression**

After validating the involvement of TGF $\beta$  signaling, we next wanted to look at a TGF $\beta$  target gene with a role in orofacial clefting. We decided to look at expression of SOX9, a transcription factor belonging to the SOXE group with a key role in regulating chondrocyte function [27, 28]. *SOX9* mutations have been identified in patients with Pierre Robin sequence [29] and Campomelic (or acampomelic) dysplasia with or without sex reversal [30, 31]. Pierre Robin sequence is a series of defects including small jaw, a posteriorly placed tongue and cleft palate [29]. Campomelic dysplasia is an autosomal dominant skeletal disorder that is characterized by bowed limbs, hypoplastic or hypomineralized bones, and small chest size. Cleft palate, micrognathia (including Pierre Robin sequence), flat face and hypertelorism are also frequent features of Campomelic dysplasia. Interestingly, *SOX9* mutations in patients with Pierre Robin sequence were located in the regulatory region affecting *SOX9* expression. Furthermore, both knockdown and overexpression of *Sox9* in mouse has been shown to result in cleft palate phenotypes [27, 28, 32]. Therefore, an effect on SOX9 expression downstream of TGF $\beta$ 1 in our system would be consistent with a plausible pathogenetic mechanism of topiramate-based facial

clefts. Indeed, we found that SOX9 expression is increased following topiramate treatment (Figure 3A,B), which is consistent with a role for TGF $\beta$ 1 in stabilizing SOX9 protein [33]. Expression of another SOXE transcription factor group member, SOX10, is not altered upon topiramate treatment (Figure 3A,C), showing specificity for SOX9 upregulation. Our results with topiramate suggest that TGF $\beta$ 1-mediated altered expression of SOX9 may underlie the teratogenicity of the antiepileptic drug.

## Discussion

We utilized an unbiased cell signaling antibody array to identify 40 proteins with altered expression following topiramate treatment of HEPM cells. Although a smaller number of proteins were analyzed with the antibody array compared to an RNA-based analysis, our data suggest that the protein-based analysis provides a clearer view of signaling changes. Our antibody array data analysis showed statistically significant upregulation of TGF $\beta$ 1 ligand expression.

To validate that TGF $\beta$ 1 increase may play a physiological role in the etiology of OFC, we utilized primary MEPM cells. We used physiologically relevant doses of topiramate (25 and 50 $\mu$ M) and showed that TGF $\beta$ 1 level was increased. During palatogenesis, all three TGF $\beta$  ligands - TGF $\beta$ 1, TGF $\beta$ 2 and TGF $\beta$ 3 - are expressed in the palatal shelves. While *Tgfb3* and *Tgfb2* mouse mutants show cleft palate, the mutants for *Tgfb1* do not [34, 35]. TGF $\beta$ 1 has been shown to be a potent inducer of growth inhibition in various cell types [36-38]. However, in palate development, some evidence suggests TGF $\beta$  ligands can promote cell proliferation [39]. TGF $\beta$ 1 is strongly expressed in the distal pre-fusion palatal shelves [40]. In contrast, TGF $\beta$ 3 expression follows that of TGF $\beta$ 1 in the medial edge epithelium [35, 39]. Regardless of the complex function of individual TGF $\beta$

pathway molecules in the palatal shelves, perturbation of TGF $\beta$  signaling affects many OFC genes [39, 41] that can negatively impact palatogenesis.

To show that TGF $\beta$ 1 increase can affect downstream genes, we looked at expression of SOX9 transcription factor. Deficiency of SOX9 leads to Campomelic dysplasia, characterized by facial and skeletal anomalies, including cleft palate, midface hypoplasia, short stature and short and bowed limbs [30, 31]. However, we actually observed an increase in SOX9 levels following topiramate treatment. TGF $\beta$ -mediated increase in SOX9 expression has also been recently shown in mesenchymal fibroblasts to promote renal fibrosis [42]. Interestingly, when SOX9 is overexpressed in all chondrocytes, by insertion of *Sox9* cDNA into the *Col2a1* locus, it also results in cleft palate phenotype [27]. Thus, perturbation of SOX9 expression in either direction affects palatogenesis. A sudden increase in TGF $\beta$ 1 level may therefore disrupt this delicate regulation of SOX9 expression in the palate mesenchyme, and result in OFC.

We also looked at phospho-SMAD2, a downstream effector of the TGF $\beta$  pathway. Phosphorylation of SMAD2 by TGF $\beta$  is necessary for the stabilization of *Sox9* in palatogenesis [33]. Phospho-SMAD2 was upregulated in topiramate-treated MEPM cells, validating that topiramate increases TGF $\beta$  signaling cascade. In a recent study examining the effects of topical topiramate on wound healing using mice found significantly increased levels of TGF $\beta$  and SOX2 in epidermal cells treated with topiramate [43], consistent with a topiramate-TGF $\beta$ -SOX cascade observed in our analysis.

Antiepileptic drugs ameliorate CNS excitatory seizures by dampening overall neuronal activity. This includes downregulation of excitatory signals from glutamate receptors and upregulation of inhibitory signals from GABA receptors [44]. Topiramate has been reported to upregulate GABA levels and GABA<sub>A</sub> receptor-based signaling [45]. Importantly, increased GABA signaling

upregulates TGF $\beta$  levels [46, 47]. While mouse mutants for some components of the GABA signaling pathway result in cleft palate phenotype [48-50], the effect of GABA upregulation on palatogenesis has not been explored. Recently, upregulation of GABA receptor activity was shown to decrease cell proliferation of embryonic and neural crest cells, as well as of blastocysts [51]. These results are consistent with a potential inhibitory effect of GABA upregulation on overall embryonic development and, in particular, on neural crest-influenced orofacial morphogenesis [17]. Also in support, several studies indicate tissue-specific activation of cell death following upregulation of TGF $\beta$  signaling, as reviewed in Schuster and Krieglstein (38). Thus, our data suggest that topiramate-based upregulation of GABA signaling can increase TGF $\beta$  signaling, which in turn results in tissue-specific changes in expression of genes, such as SOX9, involved in palatogenesis.

To assess the impact of the genes encoding the 40 differentially expressed proteins on orofacial clefting, we assayed their connectivity to the 107 known OFC-related genes reported by IPA. A single IPA connectivity network included over 55% of both sets of genes (Figure 1). This high level of connectivity argues that exposure to topiramate has the potential to perturb many OFC-related genes and pathways in the developing palate. The highest connectivity in this network was centered on TGF $\beta$ 1 ligand. We also considered the possibility that the upregulation extended beyond TGF $\beta$ 1 ligand to the entire pathway. We reasoned that if TGF $\beta$  signaling was indeed upregulated in topiramate-treated HEPM cells, we would find evidence for upregulation of downstream factors from our antibody array data. Indeed, a manually curated network showed evidence for upregulation of TGF $\beta$  signaling both upstream and downstream of TGF $\beta$ 1 ligand (Figure 4) [45, 46, 52-59]. We were able to directly confirm nine molecules that were consistent

with upregulation of TGF $\beta$  signaling. We also found literature support for the topiramate-based increase in GABA signaling [45, 52] to in turn upregulate levels of TGF $\beta$ 1 [46]. Together, this network not only shows a broad upregulation of the TGF $\beta$  signaling pathway following topiramate treatment of HEPM cells, but also suggests perturbation of other signaling pathways important in embryogenesis, including Phospholipase-C-based PKC/PKA and Sonic hedgehog signaling.

The genetic network affected by topiramate treatment of palate mesenchyme cells provides an important framework to study the OFC-related teratogenic effects. Future *in vitro* and *in vivo* studies are required to elucidate the role of increased TGF $\beta$  signaling in the teratogenicity of topiramate. Topiramate is one of many anti-epileptic and mood-stabilizing drugs that have recently been associated with structural birth defects. All of these drugs share certain molecular characteristics and targets. Therefore, understanding the molecular genetic mechanism behind topiramate teratogenicity may also provide clues to the general link reported among a broad class of antiepileptic drugs and birth defects.

## Acknowledgements

We thank Dr. Partha Kasturi and Dr. Hemantkumar Chavan (KUMC) for assistance and use of their equipment; Dr. Karin Zueckert-Gaudenz and Mr. Brian Flaherty (Molecular Biology Core, Stowers Institute for Medical Research, Kansas City, MO) for use of their microarray scanners; Ms. Shannon Zhang (Full Moon BioSystems Inc.) for assistance with antibody array data analysis; Mr. Byunggil Yoo (KUMC) for assistance and useful discussions. This project was supported in part by the National Institutes of Health Center of Biomedical Research Excellence (COBRE) grant (National Institute of General Medical Sciences P20 GM104936, I.S.), Kansas IDeA

Network for Biomedical Research Excellence grant (National Institute of General Medical Sciences P20 GM103418, I.S.), Kansas Intellectual and Developmental Disabilities Research Center grant (U54 Eunice Kennedy Shriver National Institute of Child Health and Human Development, HD090216, I.S. and S.G.), and a National Institute of Dental and Craniofacial Research grant (DE026172, I.S.).

### **Author contributions:**

S.K.R. conceived the project. I.S. and S.K.R. conceived and designed the experiments. S.K.R., J.P.G., A.J.O., L.A.H., N.J.E., N.R.W. and E.G.H. performed the experiments. S.G. performed the statistical analysis on the antibody array data. S.K.R., J.P.G., A.J.O., L.A.H., N.J.E., N.R.W. and I.S. analyzed the data. S.K.R., J.P.G., L.A.H., S.G. and I.S. wrote the paper. N.J.E., A.J.O., N.R.W. and E.G.H. reviewed and edited the manuscript.

### **Conflict of Interest**

The authors do not have any competing financial interests pertaining to the studies presented here.

### **References**

1. McElroy SL, Arnold LM, Shapira NA, *et al.* Topiramate in the treatment of binge eating disorder associated with obesity: a randomized, placebo-controlled trial. *Am J Psychiatry*. 2003;160(2):255-61. PubMed PMID: 12562571.
2. Hoopes SP, Reimherr FW, Hedges DW, *et al.* Treatment of bulimia nervosa with topiramate in a randomized, double-blind, placebo-controlled trial, part 1: improvement in binge and purge measures. *J Clin Psychiatry*. 2003;64(11):1335-41. PubMed PMID: 14658948.
3. Johnson BA, Ait-Daoud N, Bowden CL, *et al.* Oral topiramate for treatment of alcohol dependence: a randomised controlled trial. *Lancet*. 2003;361(9370):1677-85. doi: 10.1016/S0140-6736(03)13370-3. PubMed PMID: 12767733.



4. Ko YH, Joe SH, Jung IK, Kim SH. Topiramate as an adjuvant treatment with atypical antipsychotics in schizophrenic patients experiencing weight gain. *Clin Neuropharmacol*. 2005;28(4):169-75. Epub 2005/08/03. PubMed PMID: 16062095.
5. Ondo WG, Jankovic J, Connor GS, *et al*. Topiramate in essential tremor: a double-blind, placebo-controlled trial. *Neurology*. 2006;66(5):672-7. Epub 2006/01/27. doi: 10.1212/01.wnl.0000200779.03748.0f. PubMed PMID: 16436648.
6. Koo J, Zavras A. Antiepileptic drugs (AEDs) during pregnancy and risk of congenital jaw and oral malformation. *Oral Dis*. 2013;19(7):712-20. doi: 10.1111/odi.12061. PubMed PMID: 23305414.
7. Meador KJ, Pennell PB, Harden CL, *et al*. Pregnancy registries in epilepsy: a consensus statement on health outcomes. *Neurology*. 2008;71(14):1109-17. doi: 10.1212/01.wnl.0000316199.92256.af. PubMed PMID: 18703463.
8. MacDonald SC, Bateman BT, McElrath TF, Hernandez-Diaz S. Mortality and Morbidity During Delivery Hospitalization Among Pregnant Women With Epilepsy in the United States. *JAMA Neurol*. 2015;72(9):981-8. Epub 2015/07/07. doi: 10.1001/jamaneurol.2015.1017. PubMed PMID: 26147878; PMCID: PMC4721221.
9. Craig JJ, Hunt SJ. Treating women with juvenile myoclonic epilepsy. *Pract Neurol*. 2009;9(5):268-77. doi: 10.1136/jnnp.2009.187898. PubMed PMID: 19762886.
10. Hunt S, Russell A, Smithson WH, *et al*. Topiramate in pregnancy: preliminary experience from the UK Epilepsy and Pregnancy Register. *Neurology*. 2008;71(4):272-6. doi: 10.1212/01.wnl.0000318293.28278.33. PubMed PMID: 18645165.
11. Tennis P, Chan KA, Curkendall SM, *et al*. Topiramate use during pregnancy and major congenital malformations in multiple populations. *Birth Defects Res A Clin Mol Teratol*. 2015;103(4):269-75. doi: 10.1002/bdra.23357. PubMed PMID: 25776342.
12. Margulis AV, Mitchell AA, Gilboa SM, *et al*. Use of topiramate in pregnancy and risk of oral clefts. *Am J Obstet Gynecol*. 2012;207(5):405 e1-7. doi: 10.1016/j.ajog.2012.07.008. PubMed PMID: 22917484; PMCID: PMC3484193.
13. Alsaad AM, Chaudhry SA, Koren G. First trimester exposure to topiramate and the risk of oral clefts in the offspring: A systematic review and meta-analysis. *Reprod Toxicol*. 2015;53:45-50. doi: 10.1016/j.reprotox.2015.03.003. PubMed PMID: 25797654.
14. Holmes LB, Wyszynski DF, Lieberman E. The AED (antiepileptic drug) pregnancy registry: a 6-year experience. *Arch Neurol*. 2004;61(5):673-8. doi: 10.1001/archneur.61.5.673. PubMed PMID: 15148143.
15. Hernandez-Diaz S, Smith CR, Shen A, *et al*. Comparative safety of antiepileptic drugs during pregnancy. *Neurology*. 2012;78(21):1692-9. doi: 10.1212/WNL.0b013e3182574f39. PubMed PMID: 22551726.

16. Hill DS, Wlodarczyk BJ, Palacios AM, Finnell RH. Teratogenic effects of antiepileptic drugs. *Expert Rev Neurother.* 2010;10(6):943-59. doi: 10.1586/ern.10.57. PubMed PMID: 20518610; PMCID: PMC2970517.
17. Cordero DR, Brugmann S, Chu Y, *et al.* Cranial neural crest cells on the move: their roles in craniofacial development. *Am J Med Genet A.* 2011;155A(2):270-9. Epub 2011/01/29. doi: 10.1002/ajmg.a.33702. PubMed PMID: 21271641; PMCID: PMC3039913.
18. Bush JO, Jiang R. Palatogenesis: morphogenetic and molecular mechanisms of secondary palate development. *Development.* 2012;139(2):231-43. Epub 2011/12/22. doi: 10.1242/dev.067082. PubMed PMID: 22186724; PMCID: PMC3243091.
19. Benjamini Y, Hochberg Y. Controlling the false discovery rate: a practical and powerful approach to multiple testing. *Journal of the Royal Statistical Society Series B (Methodological).* 1995:289-300.
20. Irizarry RA, Hobbs B, Collin F, *et al.* Exploration, normalization, and summaries of high density oligonucleotide array probe level data. *Biostatistics.* 2003;4(2):249-64. doi: 10.1093/biostatistics/4.2.249. PubMed PMID: 12925520.
21. Uckun FM, Qazi S, Ma H, *et al.* A rationally designed nanoparticle for RNA interference therapy in B-lineage lymphoid malignancies. *EBioMedicine.* 2014;1(2-3):141-55. doi: 10.1016/j.ebiom.2014.10.013. PubMed PMID: 25599086; PMCID: PMC4292938.
22. He HJ, Zong Y, Bernier M, Wang L. Sensing the insulin signaling pathway with an antibody array. *Proteomics Clin Appl.* 2009;3(12):1440-50. doi: 10.1002/prca.200900020. PubMed PMID: 21136963; PMCID: PMC3517193.
23. Noh MR, Kim SK, Sun W, *et al.* Neuroprotective effect of topiramate on hypoxic ischemic brain injury in neonatal rats. *Exp Neurol.* 2006;201(2):470-8. doi: 10.1016/j.expneurol.2006.04.038. PubMed PMID: 16884714.
24. Sachdeo RC, Sachdeo SK, Walker SA, *et al.* Steady-state pharmacokinetics of topiramate and carbamazepine in patients with epilepsy during monotherapy and concomitant therapy. *Epilepsia.* 1996;37(8):774-80. Epub 1996/08/01. doi: 10.1111/j.1528-1157.1996.tb00651.x. PubMed PMID: 8764818.
25. May TW, Rambeck B, Jurgens U. Serum concentrations of topiramate in patients with epilepsy: influence of dose, age, and comedication. *Ther Drug Monit.* 2002;24(3):366-74. Epub 2002/05/22. doi: 10.1097/00007691-200206000-00007. PubMed PMID: 12021627.
26. Berry DJ, Patsalos PN. Comparison of topiramate concentrations in plasma and serum by fluorescence polarization immunoassay. *Ther Drug Monit.* 2000;22(4):460-4. Epub 2000/08/15. doi: 10.1097/00007691-200008000-00016. PubMed PMID: 10942188.
27. Akiyama H, Lyons JP, Mori-Akiyama Y, *et al.* Interactions between Sox9 and beta-catenin control chondrocyte differentiation. *Genes Dev.* 2004;18(9):1072-87. Epub 2004/05/11. doi: 10.1101/gad.1171104. PubMed PMID: 15132997; PMCID: PMC406296.

28. Bi W, Huang W, Whitworth DJ, *et al.* Haploinsufficiency of Sox9 results in defective cartilage primordia and premature skeletal mineralization. *Proc Natl Acad Sci U S A*. 2001;98(12):6698-703. Epub 2001/05/24. doi: 10.1073/pnas.111092198. PubMed PMID: 11371614; PMCID: PMC34415.
29. Benko S, Fantes JA, Amiel J, *et al.* Highly conserved non-coding elements on either side of SOX9 associated with Pierre Robin sequence. *Nat Genet*. 2009;41(3):359-64. Epub 2009/02/24. doi: 10.1038/ng.329. PubMed PMID: 19234473.
30. Wagner T, Wirth J, Meyer J, *et al.* Autosomal sex reversal and campomelic dysplasia are caused by mutations in and around the SRY-related gene SOX9. *Cell*. 1994;79(6):1111-20. Epub 1994/12/16. doi: 10.1016/0092-8674(94)90041-8. PubMed PMID: 8001137.
31. Kwok C, Weller PA, Guioli S, *et al.* Mutations in SOX9, the gene responsible for Campomelic dysplasia and autosomal sex reversal. *Am J Hum Genet*. 1995;57(5):1028-36. Epub 1995/11/01. PubMed PMID: 7485151; PMCID: PMC1801368.
32. Kist R, Schrewe H, Balling R, Scherer G. Conditional inactivation of Sox9: a mouse model for campomelic dysplasia. *Genesis*. 2002;32(2):121-3. Epub 2002/02/22. PubMed PMID: 11857796.
33. Coricor G, Serra R. TGF-beta regulates phosphorylation and stabilization of Sox9 protein in chondrocytes through p38 and Smad dependent mechanisms. *Sci Rep*. 2016;6:38616. Epub 2016/12/09. doi: 10.1038/srep38616. PubMed PMID: 27929080; PMCID: PMC5144132.
34. Iwata J, Parada C, Chai Y. The mechanism of TGF-beta signaling during palate development. *Oral Dis*. 2011;17(8):733-44. doi: 10.1111/j.1601-0825.2011.01806.x. PubMed PMID: 21395922; PMCID: PMC3329177.
35. Sanford LP, Ormsby I, Gittenberger-de Groot AC, *et al.* TGFbeta2 knockout mice have multiple developmental defects that are non-overlapping with other TGFbeta knockout phenotypes. *Development*. 1997;124(13):2659-70. Epub 1997/07/01. PubMed PMID: 9217007; PMCID: PMC3850286.
36. Derynck R, Akhurst RJ, Balmain A. TGF-beta signaling in tumor suppression and cancer progression. *Nat Genet*. 2001;29(2):117-29. doi: 10.1038/ng1001-117. PubMed PMID: 11586292.
37. Bissell DM. Chronic liver injury, TGF-beta, and cancer. *Exp Mol Med*. 2001;33(4):179-90. doi: 10.1038/emmm.2001.31. PubMed PMID: 11795478.
38. Schuster N, Kriegstein K. Mechanisms of TGF-beta-mediated apoptosis. *Cell Tissue Res*. 2002;307(1):1-14. doi: 10.1007/s00441-001-0479-6. PubMed PMID: 11810309.
39. Zhu X, Ozturk F, Pandey S, *et al.* Implications of TGFbeta on Transcriptome and Cellular Biofunctions of Palatal Mesenchyme. *Frontiers in physiology*. 2012;3:85. doi: 10.3389/fphys.2012.00085. PubMed PMID: 22514539; PMCID: PMC3322527.

40. Iordanskaia T, Nawshad A. Mechanisms of transforming growth factor beta induced cell cycle arrest in palate development. *J Cell Physiol.* 2011;226(5):1415-24. doi: 10.1002/jcp.22477. PubMed PMID: 20945347; PMCID: PMC3095042.
41. Ozturk F, Li Y, Zhu X, *et al.* Systematic analysis of palatal transcriptome to identify cleft palate genes within TGFbeta3-knockout mice alleles: RNA-Seq analysis of TGFbeta3 Mice. *BMC genomics.* 2013;14:113. doi: 10.1186/1471-2164-14-113. PubMed PMID: 23421592; PMCID: PMC3618314.
42. Li H, Cai H, Deng J, *et al.* TGF-beta-mediated upregulation of Sox9 in fibroblast promotes renal fibrosis. *Biochim Biophys Acta Mol Basis Dis.* 2018;1864(2):520-32. Epub 2017/11/22. doi: 10.1016/j.bbdis.2017.11.011. PubMed PMID: 29158184.
43. Jara CP, Bobbo VCD, Carraro RS, *et al.* Effects of topical topiramate in wound healing in mice. *Arch Dermatol Res.* 2018;310(4):363-73. Epub 2018/02/25. doi: 10.1007/s00403-018-1822-z. PubMed PMID: 29476247.
44. Bialer M, White HS. Key factors in the discovery and development of new antiepileptic drugs. *Nat Rev Drug Discov.* 2010;9(1):68-82. doi: 10.1038/nrd2997. PubMed PMID: 20043029.
45. Braga MF, Aroniadou-Anderjaska V, Li H, Rogawski MA. Topiramate reduces excitability in the basolateral amygdala by selectively inhibiting GluK1 (GluR5) kainate receptors on interneurons and positively modulating GABAA receptors on principal neurons. *J Pharmacol Exp Ther.* 2009;330(2):558-66. doi: 10.1124/jpet.109.153908. PubMed PMID: 19417176.
46. Soltani N, Qiu H, Aleksic M, *et al.* GABA exerts protective and regenerative effects on islet beta cells and reverses diabetes. *Proc Natl Acad Sci U S A.* 2011;108(28):11692-7. doi: 10.1073/pnas.1102715108. PubMed PMID: 21709230; PMCID: PMC3136292.
47. Prud'homme GJ, Glinka Y, Hasilo C, *et al.* GABA protects human islet cells against the deleterious effects of immunosuppressive drugs and exerts immunoinhibitory effects alone. *Transplantation.* 2013;96(7):616-23. doi: 10.1097/TP.0b013e31829c24be. PubMed PMID: 23851932.
48. Wee EL, Norman EJ, Zimmerman EF. Presence of gamma-aminobutyric acid in embryonic palates of AJ and SWV mouse strains. *J Craniofac Genet Dev Biol.* 1986;6(1):53-61. PubMed PMID: 3700592.
49. Hagiwara N, Katarova Z, Siracusa LD, Brilliant MH. Nonneuronal expression of the GABA(A) beta3 subunit gene is required for normal palate development in mice. *Dev Biol.* 2003;254(1):93-101. PubMed PMID: 12606284.
50. Asada H, Kawamura Y, Maruyama K, *et al.* Cleft palate and decreased brain gamma-aminobutyric acid in mice lacking the 67-kDa isoform of glutamic acid decarboxylase. *Proc Natl Acad Sci U S A.* 1997;94(12):6496-9. PubMed PMID: 9177246; PMCID: PMC21078.

51. Andang M, Hjerling-Leffler J, Moliner A, *et al.* Histone H2AX-dependent GABA(A) receptor regulation of stem cell proliferation. *Nature*. 2008;451(7177):460-4. doi: 10.1038/nature06488. PubMed PMID: 18185516.
52. White HS, Brown SD, Woodhead JH, *et al.* Topiramate enhances GABA-mediated chloride flux and GABA-evoked chloride currents in murine brain neurons and increases seizure threshold. *Epilepsy Res*. 1997;28(3):167-79. PubMed PMID: 9332882.
53. Asbun J, Villarreal FJ. The pathogenesis of myocardial fibrosis in the setting of diabetic cardiomyopathy. *J Am Coll Cardiol*. 2006;47(4):693-700. Epub 2006/02/21. doi: 10.1016/j.jacc.2005.09.050. PubMed PMID: 16487830.
54. Hassan JH, Chelucci C, Peschle C, Sorrentino V. Transforming growth factor beta (TGF-beta) inhibits expression of fibrinogen and factor VII in a hepatoma cell line. *Thromb Haemost*. 1992;67(4):478-83. PubMed PMID: 1321511.
55. Chetaille P, Preuss C, Burkhard S, *et al.* Mutations in SGOL1 cause a novel cohesinopathy affecting heart and gut rhythm. *Nat Genet*. 2014;46(11):1245-9. doi: 10.1038/ng.3113. PubMed PMID: 25282101.
56. Aggarwal K, Massague J. Ubiquitin removal in the TGF-beta pathway. *Nat Cell Biol*. 2012;14(7):656-7. doi: 10.1038/ncb2534. PubMed PMID: 22743709.
57. Eickelberg O, Kohler E, Reichenberger F, *et al.* Extracellular matrix deposition by primary human lung fibroblasts in response to TGF-beta1 and TGF-beta3. *Am J Physiol*. 1999;276(5 Pt 1):L814-24. PubMed PMID: 10330038.
58. McKean DM, Niswander L. Defects in GPI biosynthesis perturb Cripto signaling during forebrain development in two new mouse models of holoprosencephaly. *Biol Open*. 2012;1(9):874-83. doi: 10.1242/bio.20121982. PubMed PMID: 23213481; PMCID: PMC3507239.
59. Chung Y, Fu E. Crosstalk between Shh and TGF-beta signaling in cyclosporine-enhanced cell proliferation in human gingival fibroblasts. *PLoS One*. 2013;8(7):e70128. doi: 10.1371/journal.pone.0070128. PubMed PMID: 23922933; PMCID: PMC3724833.

**Table 1: List of 40 proteins with statistically significant change in expression and a 1.15-fold-change cut-off in HEPM cells following topiramate treatment.**

| <i>Protein Name</i>                                                   | <i>Symbol</i>     | <i>UniProtKB<br/>ID</i> | <i>Antibody<br/>Array ID</i> | <i>Fold<br/>Change</i> |
|-----------------------------------------------------------------------|-------------------|-------------------------|------------------------------|------------------------|
| Checkpoint kinase 2                                                   | CHEK2             | O96017                  | 659                          | 1.96                   |
| Low-density lipoprotein receptor class A domain-containing protein 1  | LDLRAD1 /<br>LRP1 | Q5T700                  | 109                          | 1.64                   |
| Aldehyde dehydrogenase 7                                              | ALDH3B1           | P43353                  | 92                           | 1.46                   |
| NADPH oxidase 5                                                       | NOX5              | Q96PH1                  | 282                          | 1.46                   |
| Proto-oncogene tyrosine-protein kinase receptor Ret                   | RET               | P07949                  | 490                          | 1.42                   |
| Cardiac troponin I                                                    | TNNI3(cTnl)       | P19429                  | 146                          | 1.39                   |
| Transforming Growth Factor beta 1                                     | TGFB1             | P01137                  | 377                          | 1.39                   |
| Unconventional myosin Id                                              | MYO1D             | O94832                  | 276                          | 1.37                   |
| Tyrosine-protein kinase receptor 3                                    | TYRO3             | Q06418                  | 478                          | 1.33                   |
| Cyclosome 1                                                           | APC1              | Q9H1A4                  | 1093                         | 1.32                   |
| Superoxide dismutase 1                                                | SOD1              | P00441                  | 996                          | 1.31                   |
| Oral cancer-overexpressed protein 1                                   | ORAV1 /<br>ORAOV1 | Q8WV07                  | 1078                         | 1.30                   |
| Growth arrest and DNA damage-inducible proteins-interacting protein 1 | GADD45GIP1        | Q8TAE8                  | 1285                         | 1.27                   |
| Phosphatidylinositol-glycan biosynthesis class H protein              | PIGH              | Q14442                  | 453                          | 1.25                   |



|                                                         |                  |        |      |       |
|---------------------------------------------------------|------------------|--------|------|-------|
| CD30 Ligand                                             | CD153            | P32971 | 220  | 1.24  |
| Patched                                                 | PTCH1            | Q13635 | 35   | 1.23  |
| Cadherin-10, T2-cadherin                                | CDH10            | Q9Y6N8 | 415  | 1.21  |
| ATP synthase subunit delta,<br>mitochondrial            | ATP5D            | P30049 | 261  | 1.19  |
| TNF Receptor1-associated DEATH<br>domain protein        | TRADD<br>/TNFR1  | Q15628 | 716  | 1.19  |
| Alcohol dehydrogenase class 4 mu/sigma<br>chain         | ADH7             | P40394 | 91   | 1.19  |
| Interferon Regulatory Factor 4                          | IRF4             | Q15306 | 730  | 1.18  |
| Bcl10-interacting CARD protein                          | C9ORF89          | Q96LW7 | 422  | -1.15 |
| S-phase kinase-associated protein 1                     | SKP1A/p19        | P63208 | 363  | -1.16 |
| B melanoma antigen 3/ Cancer/testis<br>antigen 2.3      | BAGE3            | Q86Y29 | 420  | -1.20 |
| Cancer-associated Gene Protein                          | ATBP3 /<br>MTUS1 | Q7Z7A3 | 907  | -1.20 |
| SUMO1-activating enzyme 2                               | UBA2             | Q9UBT2 | 874  | -1.22 |
| Tissue inhibitor of metalloproteinases 2                | TIMP2            | P16035 | 537  | -1.22 |
| RING finger and WD repeat domain<br>protein 2           | RFWD2            | Q8NHY2 | 1107 | -1.23 |
| Coagulation factor VII (light chain,<br>Cleaved-Arg212) | FA7              | P08709 | 1156 | -1.29 |
| Rho guanine nucleotide exchange factor 3                | ARHGEF3          | Q9NR81 | 1123 | -1.30 |

|                                                      |         |        |      |       |
|------------------------------------------------------|---------|--------|------|-------|
| Cytochrome c oxidase assembly protein                | COX11   | Q9Y6N1 | 911  | -1.31 |
| COX11                                                |         |        |      |       |
| Diacylglycerol Kinase eta                            | DGKH    | Q86XP1 | 908  | -1.36 |
| ATP-binding cassette sub-family A member 8           | ABCA8   | O94911 | 848  | -1.37 |
| Shugoshin-like 1                                     | SGOL1   | Q5FBB7 | 895  | -1.37 |
| Guanylate Cyclase Beta 1                             | GUCY1B3 | Q02153 | 853  | -1.38 |
| Cell division cycle 7 related kinase                 | CDC7    | O00311 | 1044 | -1.38 |
| Aldo-keto reductase family 1 member C-like protein 1 | AKR1CL1 | Q5T2L2 | 246  | -1.41 |
| Interleukin 2                                        | IL2     | P60568 | 832  | -1.55 |
| Cytochrome P450 7B1                                  | CYP7B1  | O75881 | 802  | -1.82 |
| Ubiquitin-protein ligase E3B                         | UBE3B   | Q7Z3V4 | 291  | -2.19 |



## Figure Legends

**Figure 1: TGFβ1 showed highest connectivity in IPA-generated network of differentially expressed gene products from topiramate-treated HEPM cells and known orofacial clefting-associated genes.** The 40 gene products with differential expression following 6-hour, 1000μM topiramate treatment of HEPM cells were analyzed with Ingenuity Systems pathway analysis (IPA) software for possible interaction with 107 IPA-identified OFC genes. A single resulting network accounted for 22 (55%) of the topiramate-treated HEPM genes in association with 87 (81%) known OFC-related genes. The upregulated or downregulated genes from the HEPM data were colored red or green, respectively. The only gene common between the two datasets was *TGFB1*, which also displays the highest connectivity in the network.

**Figure 2: Topiramate treatment of primary MEPM cells upregulated TGFβ1 expression.** To validate upregulation of TGFβ1, we isolated primary mouse embryonic palate mesenchyme (MEPM) cells from E13.5 embryos and treated them with 25μM, 50μM, 250μM or 1mM topiramate for 6 hours, as indicated. These cells were analyzed for TGFβ1 expression by immunostaining (A-E) and Western blotting (F-G). There was a significant increase in intracellular TGFβ1 expression upon as little as 50μM topiramate treatment (A-E), which was quantitated in at least 30 cells per treatment from 3 independent experiments (\*\*,  $p<0.003$ ; \*\*\*,  $p<0.0003$ ). Western blot analysis also showed a significant increase upon treatment with 50μM topiramate (F, G). We also showed increased phospho-SMAD2 (P-SMAD2) levels with both 25μM and 50 μM topiramate treatments (F, G), indicating an upregulation of TGFβ1 signaling cascade (\*,  $p<0.019$ ).

**Figure 3: Topiramate treatment of primary MEPM cells resulted in increased SOX9 expression.** We looked at expression of SOX9, a TGFβ1 target gene involved in orofacial clefting. Western blot analysis of topiramate-treated primary MEPM cells resulted in statistically significant increase in SOX9 expression (A,B; \*\*, p<0.006). In contrast, expression of SOX10 is not altered upon topiramate treatment (A,C; ns, not significant).

**Figure 4: Model of topiramate action on MEPM cells.** Our model predicts that topiramate is capable of stimulating GABA receptors in the palate to upregulate TGFβ1 expression. TGFβ1 expression is tightly regulated during craniofacial morphogenesis. Misregulation of TGFβ1 signaling can lead to altered expression of orofacial clefting genes. For example, we show that topiramate leads to upregulation of SOX9 expression, which is sufficient to result in cleft palate in mice. In order to gather corroborating evidence for the upregulation of TGFβ signaling from the 39 (excluding TGFβ) differentially expressed gene products, we performed a manual curation of the literature for connectivity to TGFβ1. Our analysis revealed that changes in an additional seven (18%) of the proteins are consistent with upregulation of TGFβ1 signaling. Moreover, these molecules affect TGFβ1 signaling both upstream and downstream of the TGFβ1 ligand, suggesting a concerted global upregulation of the pathway. The solid-colored molecules are from the antibody-array or western blot results, while the spotted molecules are changes in upstream effectors predicted from literature. Citation number (#) corresponds to listed references.

Rafi\_Figure 1

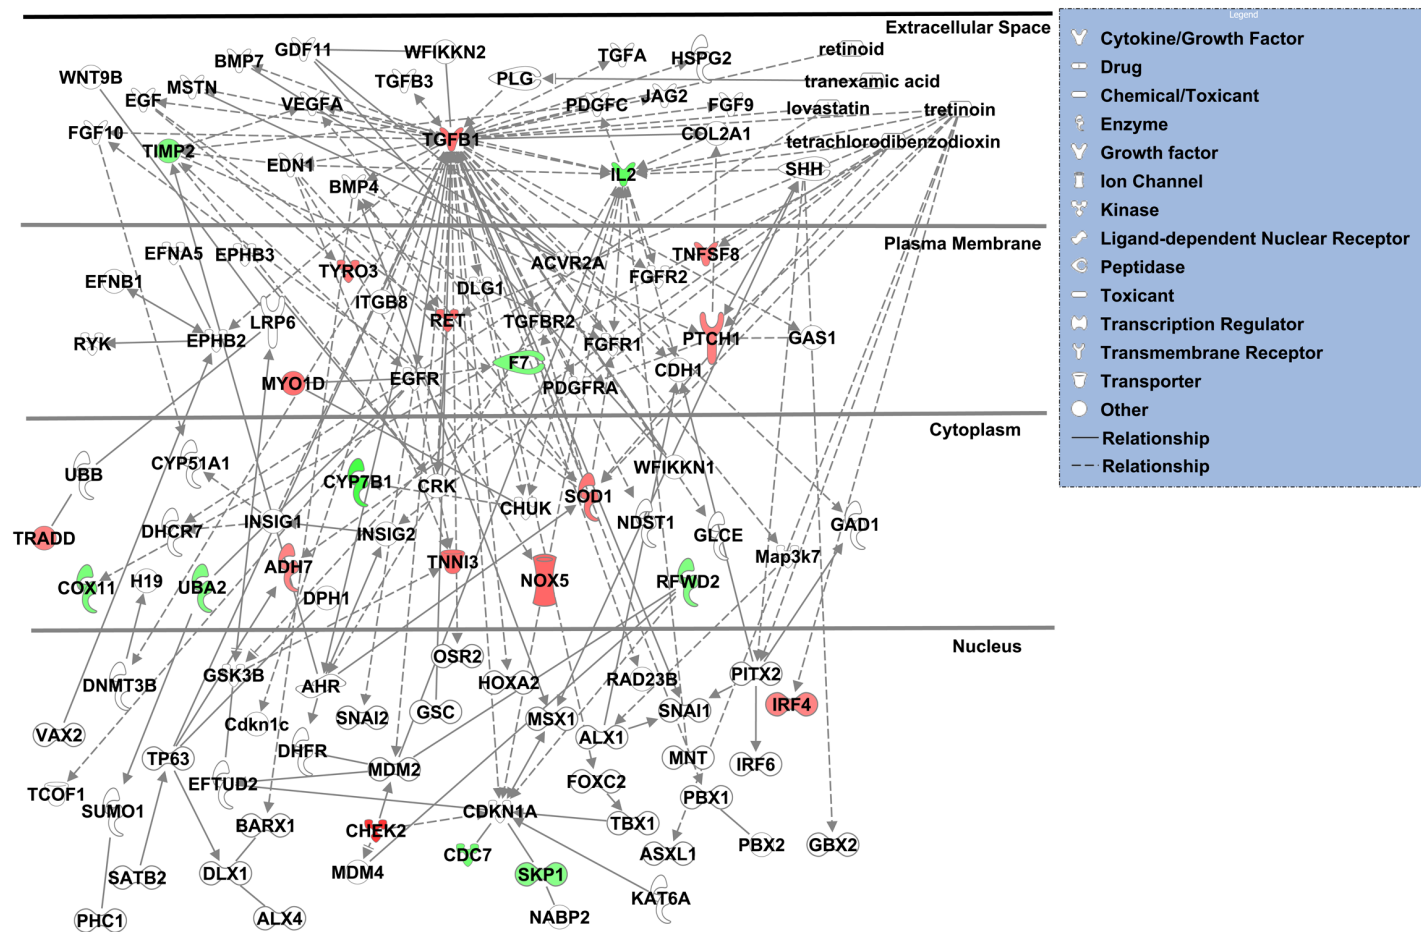

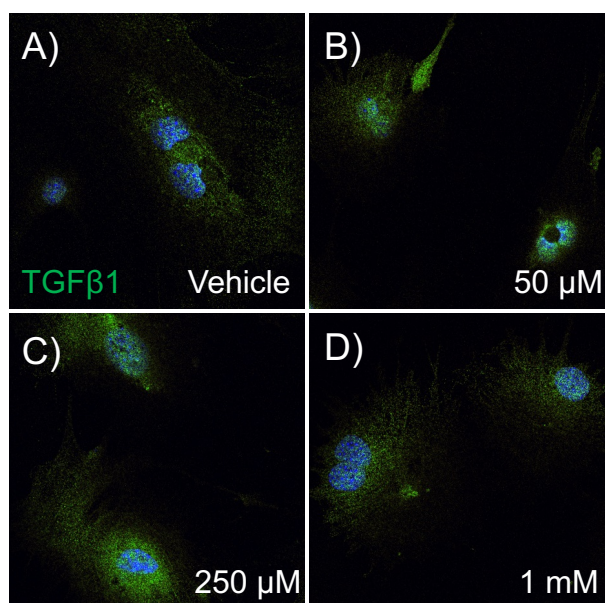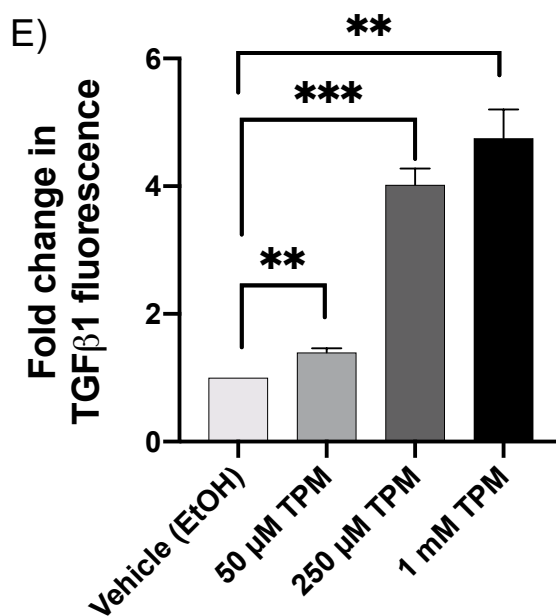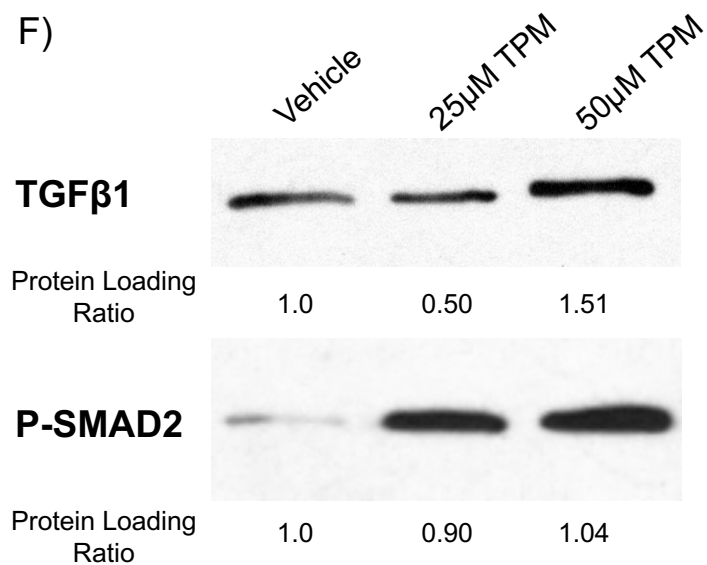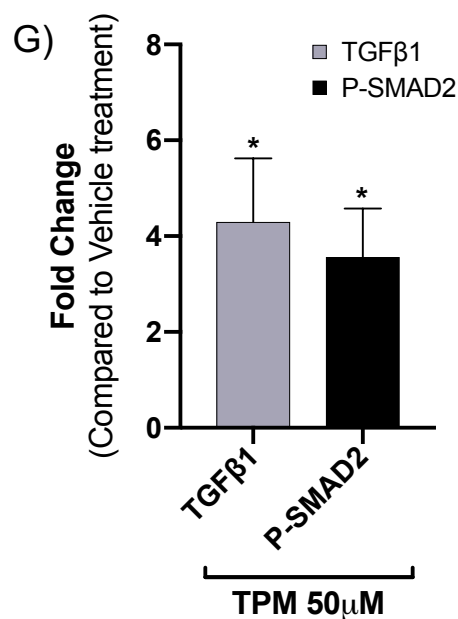

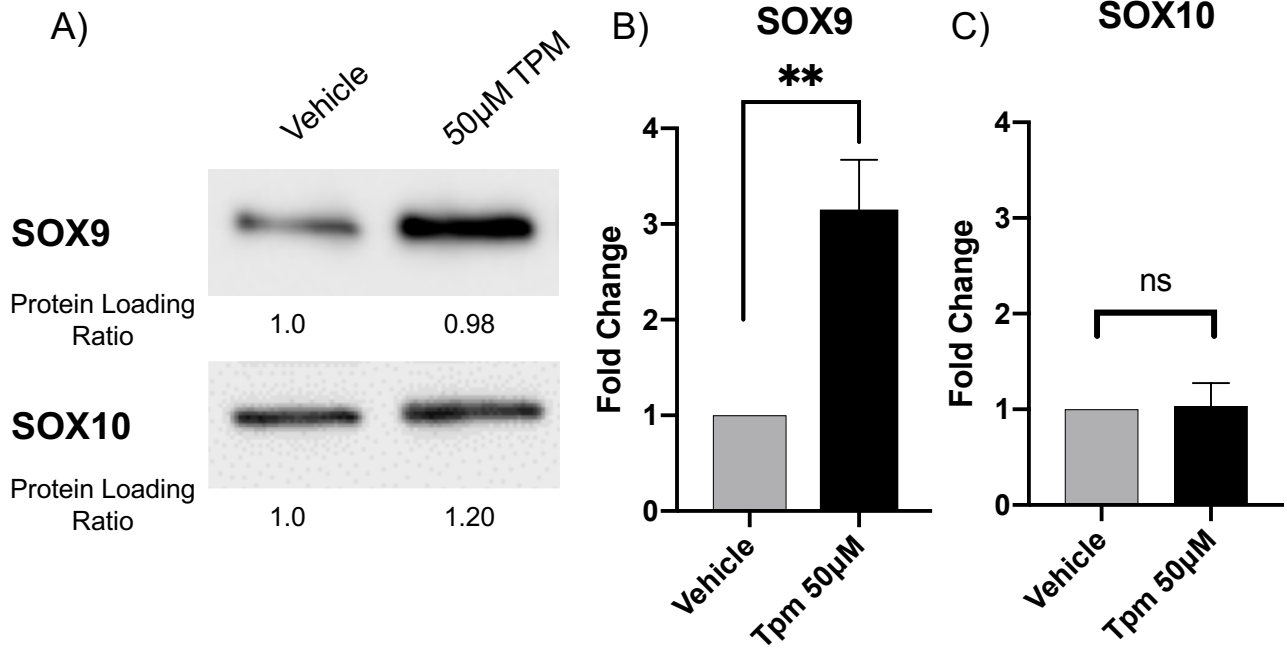

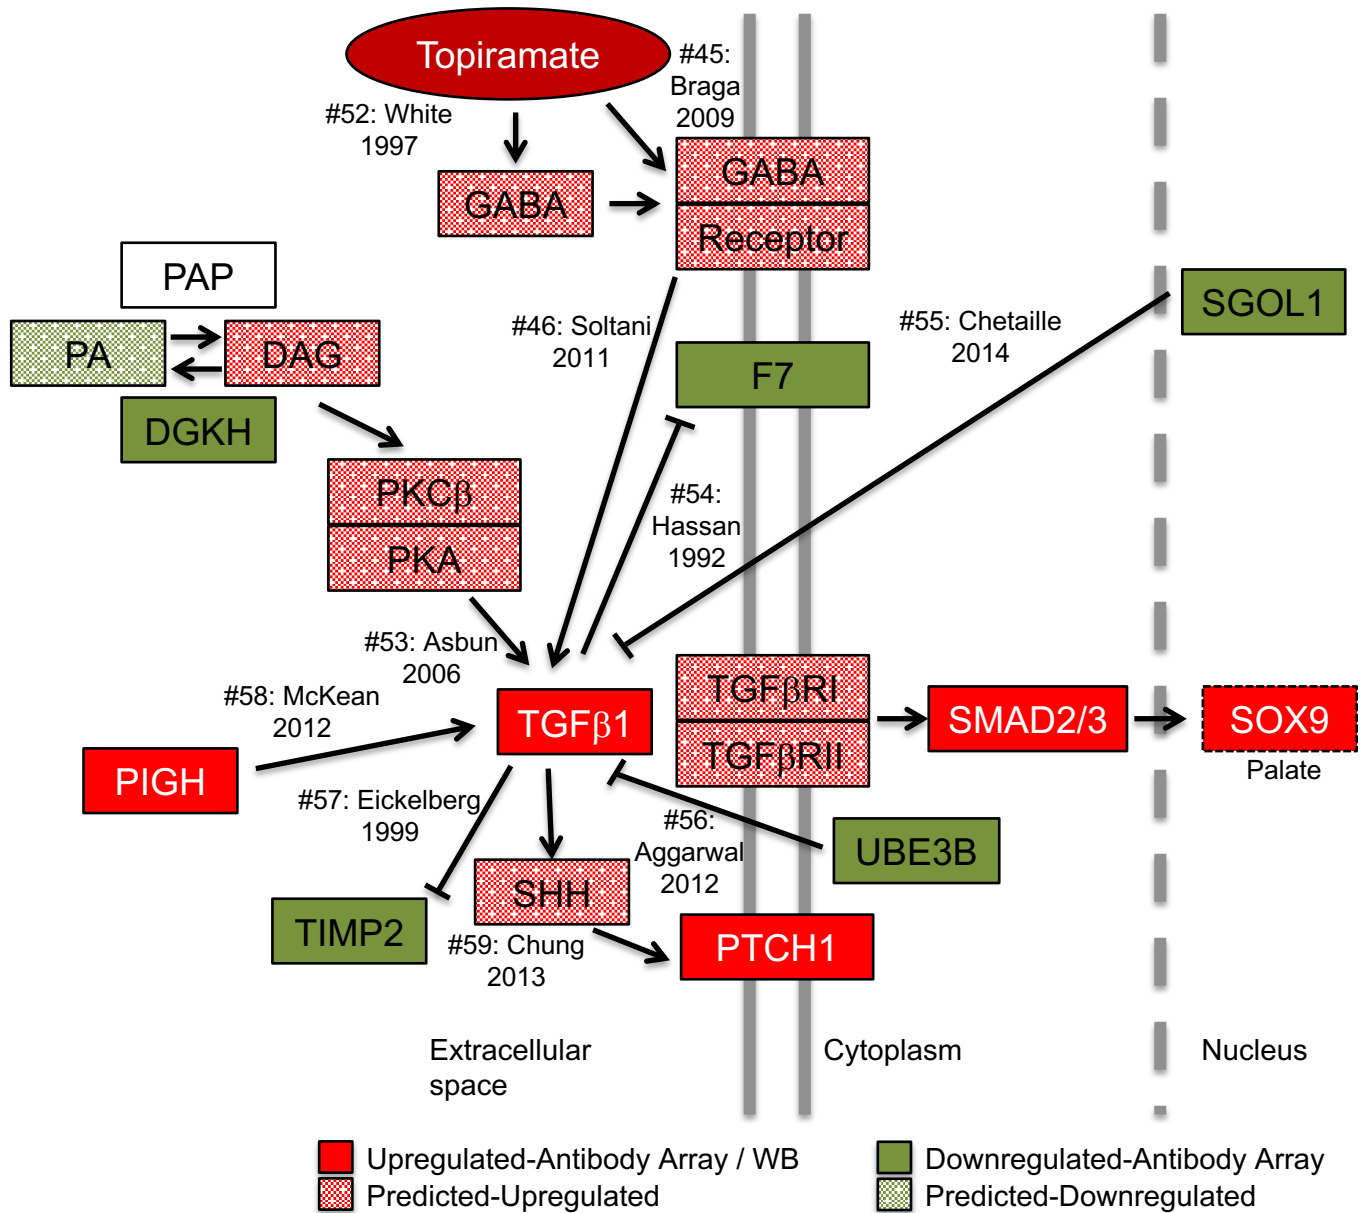

Source: https://www.biorxiv.org/content/10.1101/2019.12.31.892042v1.full.pdf
